# Supplementary material for: Juvenile idiopathic arthritis in adulthood: fulfilment of classification criteria for adult rheumatic diseases, long-term outcomes and predictors of inactive disease, functional status and damage
Source: PubMed Central journal article supplement — RMD Open. 2016 Sep 22;2(2):e000304. doi: 10.1136/rmdopen-2016-000304 (PMC5051503; doi:10.1136/rmdopen-2016-000304), 2016-09-22
Supplement: rmdopen-2016-000304supp_table.pdf [file rmdopen-2016-000304supp_table.pdf]

Supplementary table 1.

**Outcomes of patients with disease onset before and after 2001.**

| Outcomes                         | Disease onset before 2001 (n=319) | Disease onset after 2001 (n=107) | ( $\beta$ /OR/RRR) p-value           | ( $\beta$ /OR/RRR) Adjusted p-value* |
|----------------------------------|-----------------------------------|----------------------------------|--------------------------------------|--------------------------------------|
| Inactive disease                 | 70 (30.70%)                       | 29 (40.85%)                      | (OR=1.56)<br>0.114                   | (OR=0.52)<br>0.092                   |
| HAQ score                        | 0.63±0.72                         | 0.20±0.39                        | ( $\beta$ =-0.43)<br><0.001†         | ( $\beta$ =0.05) 0.539               |
| JADI-E score                     | 1.01±1.80                         | 0.23±0.77                        | ( $\beta$ =-0.78)<br>0.024†          | ( $\beta$ =-0.12)<br>0.791           |
| JADI-A score                     | 10.26±16.07                       | 0.78±2.84                        | ( $\beta$ =-9.48)<br>0.001†          | ( $\beta$ =-3.00)<br>0.371           |
| Retirement due to JIA disability | 29 (15.26%)                       | 0 (0%)                           | (RRR=9.3x10 <sup>-8</sup> )<br>0.988 | (RRR=8.4x10 <sup>-8</sup> )<br>0.995 |

$\beta$  ( $\beta$  coefficient), OR (Odds Ratio), RRR (Relative Risk Ratio) as appropriate. HAQ - Health Assessment Questionnaire, JADI -E - Juvenile Arthritis Damage Index - extra-articular; JADI -A - Juvenile Arthritis Damage Index - articular .

†p-value<0.05.

\*Adjusted for ILAR Category and Disease duration

Sample size is not constant due to: disease onset before 2001 – inactive disease (n=228); JADI-E (n=80); JADI-A (n=103); professional activity (n=190); disease onset after 2001 – inactive disease (n=71); JADI-E (n=30); JADI-A (n=36); professional activity (n=42).
